# Supplementary material for: Characterization of Single-Spheroid Oxygen Consumption Using a Microfluidic Platform and Fluorescence Lifetime Imaging Microscopy
Source: MDPI journal article supplement (doi:10.3390/bios14020096), 2024-02-11
Supplement: s1 [file s1]

Supplementary Materials

# Characterization of Single-Spheroid Oxygen Consumption Using a Microfluidic Platform and Fluorescence Lifetime Imaging Microscopy

Santhosh Kannan <sup>1,2,3</sup>, Chien-Chung Peng <sup>1</sup>, Hsiao-Mei Wu <sup>4</sup> and Yi-Chung Tung <sup>1,5,\*</sup>

<sup>1</sup> Research Center for Applied Sciences, Academia Sinica, Taipei 115201, Taiwan

<sup>2</sup> Department of Engineering and System Science, National Tsing Hua University, Hsinchu 300044, Taiwan

<sup>3</sup> Nano Science and Technology Program, Taiwan International Graduate Program (TIGP), Academia Sinica, Taipei 115201, Taiwan

<sup>4</sup> Department of Biomechanics Engineering, National Taiwan University, Taipei 106319, Taiwan

<sup>5</sup> College of Engineering, Chang Gung University, Taoyuan 33302, Taiwan

\* Correspondence: tungy@gate.sinica.edu.tw; Tel.: +886-2-2787-3138

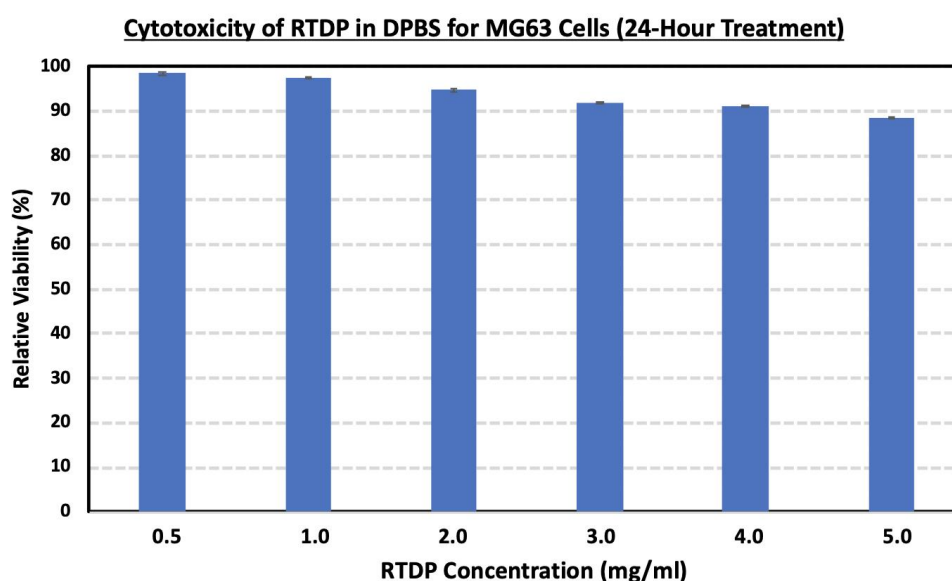

**Figure S1.** Cytotoxicity of the RTDP in DPBS for the MG-63 cells cultured as monolayers.
